# Supplementary material
Source: publisher figshare collection journal article supplement (https://gsajournals.figshare.com/ndownloader/files/27537611)
Supplement: Supplementary file 1 [file 27537611]

## Sheet: GO term analysis 
Table S2: GO term analysis. GO terms are listed for the mutants that displayed morphogenetic defects in response to Hsp90 inhibition.
Query Set/Input: the 54 genes involved in filamnetation in resposne to Hsp90 inhibition with reduced succeptibity to GdA
Background: all genes in the GRACE collection
GOID	GO_term	Cluster frequency	Background frequency	Corrected P-value	False discovery rate	Gene(s) annotated to the term	Directly Annotated GOID List
313	organellar ribosome	17 out of 54 genes, 31.5%	27 out of 2341 background genes, 1.2%	4.12e-21	0	C1_01580W_A:MRPL27:C1_06070W_A:MRPL3:C2_01030W_A:C2_02270C_A:C2_07190C_A:C2_07680W_A:C4_00660W_A:C4_03410W_A:MRP17:C5_00820W_A:C5_04530W_A:C6_01980C_A:C6_03730C_A:YML6:MRPL6	5763:324:5762:42645
5761	mitochondrial ribosome	17 out of 54 genes, 31.5%	27 out of 2341 background genes, 1.2%	4.12e-21	0	C1_01580W_A:MRPL27:C1_06070W_A:MRPL3:C2_01030W_A:C2_02270C_A:C2_07190C_A:C2_07680W_A:C4_00660W_A:C4_03410W_A:MRP17:C5_00820W_A:C5_04530W_A:C6_01980C_A:C6_03730C_A:YML6:MRPL6	5763:324:5762:42645
5739	mitochondrion	33 out of 54 genes, 61.1%	240 out of 2341 background genes, 10.3%	1.32e-18	0	C1_01580W_A:MRPL27:C1_06070W_A:MRPL3:IDH1:SHY1:C1_13010W_A:C1_13030C_A:C1_13060C_A:C2_01030W_A:C2_02270C_A:SUV3:RIM2:C2_07190C_A:C2_07680W_A:MSU1:C3_00420W_A:C3_06700C_A:C4_00660W_A:C4_03410W_A:C4_03730C_A:MRP17:PET9:C5_00820W_A:QCR2:C5_04530W_A:C6_01980C_A:C6_03730C_A:C7_00330C_A:YML6:MSK1:MRPL6:ACO1	5622:5737:30061:5763:5829:5739:262:42645:324:932:5762:16021:5750:5759:5886:5743:16020:5634:45025:5962:31314:5576:32592:62040
98798	mitochondrial protein-containing complex	21 out of 54 genes, 38.9%	69 out of 2341 background genes, 2.9%	4.31e-18	0	C1_01580W_A:MRPL27:C1_06070W_A:MRPL3:IDH1:C2_01030W_A:C2_02270C_A:SUV3:C2_07190C_A:C2_07680W_A:MSU1:C4_00660W_A:C4_03410W_A:MRP17:C5_00820W_A:QCR2:C5_04530W_A:C6_01980C_A:C6_03730C_A:YML6:MRPL6	30061:5763:5739:262:42645:324:5762:5750:5886:5759:16020:45025:5962
5759	mitochondrial matrix	21 out of 54 genes, 38.9%	77 out of 2341 background genes, 3.3%	5.71e-17	0	C1_01580W_A:MRPL27:C1_06070W_A:MRPL3:IDH1:C2_01030W_A:C2_02270C_A:SUV3:C2_07190C_A:C2_07680W_A:C4_00660W_A:C4_03410W_A:C4_03730C_A:MRP17:C5_00820W_A:C5_04530W_A:C6_01980C_A:C6_03730C_A:YML6:MRPL6:ACO1	5622:5737:5763:5829:5739:262:42645:324:5762:5759:45025:5962:62040
44391	ribosomal subunit	17 out of 54 genes, 31.5%	43 out of 2341 background genes, 1.8%	1.61e-16	0	C1_01580W_A:MRPL27:C1_06070W_A:MRPL3:C2_01030W_A:C2_02270C_A:C2_07190C_A:C2_07680W_A:C4_00660W_A:C4_03410W_A:MRP17:C5_00820W_A:C5_04530W_A:C6_01980C_A:C6_03730C_A:YML6:MRPL6	5763:42645:324:5762
5840	ribosome	18 out of 54 genes, 33.3%	52 out of 2341 background genes, 2.2%	2.33e-16	0	C1_01580W_A:MRPL27:C1_06070W_A:MRPL3:C2_01030W_A:C2_02270C_A:C2_07190C_A:C2_07680W_A:C4_00660W_A:ZUO1:C4_03410W_A:MRP17:C5_00820W_A:C5_04530W_A:C6_01980C_A:C6_03730C_A:YML6:MRPL6	5737:5763:5840:42645:324:5762:5844:5730
315	organellar large ribosomal subunit	10 out of 54 genes, 18.5%	13 out of 2341 background genes, 0.6%	2.96e-13	0	C1_01580W_A:MRPL27:MRPL3:C2_01030W_A:C2_07190C_A:C2_07680W_A:C4_03410W_A:C5_00820W_A:YML6:MRPL6	42645:324:5762
5762	mitochondrial large ribosomal subunit	10 out of 54 genes, 18.5%	13 out of 2341 background genes, 0.6%	2.96e-13	0	C1_01580W_A:MRPL27:MRPL3:C2_01030W_A:C2_07190C_A:C2_07680W_A:C4_03410W_A:C5_00820W_A:YML6:MRPL6	42645:324:5762
15934	large ribosomal subunit	10 out of 54 genes, 18.5%	20 out of 2341 background genes, 0.9%	1.69e-10	0	C1_01580W_A:MRPL27:MRPL3:C2_01030W_A:C2_07190C_A:C2_07680W_A:C4_03410W_A:C5_00820W_A:YML6:MRPL6	42645:324:5762
5737	cytoplasm	45 out of 54 genes, 83.3%	1021 out of 2341 background genes, 43.6%	8.9e-08	0	C1_01160C_A:TIF:C1_01530C_A:C1_01580W_A:C1_02450C_A:MRPL27:CHS7:C1_06070W_A:MRPL3:IDH1:SHY1:C1_11890W_A:WRS1:C1_13010W_A:C1_13030C_A:C1_13060C_A:C2_01030W_A:C2_02270C_A:SUV3:RIM2:C2_07190C_A:C2_07680W_A:MSU1:C3_00420W_A:SES1:C3_06700C_A:KRS1:C4_00660W_A:ZUO1:C4_03410W_A:C4_03730C_A:MRP17:PET9:C5_00820W_A:QCR2:C5_04530W_A:C6_01980C_A:C6_03730C_A:C7_00330C_A:YML6:MSK1:C7_02340C_A:MRPL6:CDC60:ACO1	5763:5789:42645:324:5762:16021:5750:5886:5759:30687:5844:5962:5935:178:177:62040:5622:5737:30061:5829:5840:5777:5739:262:932:106143:5743:16020:5730:5634:176:45025:31314:10494:32592:5576:31224:16281
1990904	ribonucleoprotein complex	21 out of 54 genes, 38.9%	223 out of 2341 background genes, 9.5%	2.67e-07	0	C1_01580W_A:C1_02450C_A:MRPL27:C1_06070W_A:MRPL3:CSI2:C2_01030W_A:C2_02270C_A:C2_07190C_A:C2_07680W_A:C4_00660W_A:ZUO1:NAN1:C4_03410W_A:MRP17:C5_00820W_A:C5_04530W_A:C6_01980C_A:C6_03730C_A:YML6:MRPL6	5763:33553:32040:42645:324:5762:30687:5844:34455:5737:5840:5730:5634
314	organellar small ribosomal subunit	7 out of 54 genes, 13.0%	14 out of 2341 background genes, 0.6%	4.32e-07	0	C1_06070W_A:C2_02270C_A:C4_00660W_A:MRP17:C5_04530W_A:C6_01980C_A:C6_03730C_A	5763
5763	mitochondrial small ribosomal subunit	7 out of 54 genes, 13.0%	14 out of 2341 background genes, 0.6%	4.32e-07	0	C1_06070W_A:C2_02270C_A:C4_00660W_A:MRP17:C5_04530W_A:C6_01980C_A:C6_03730C_A	5763
15935	small ribosomal subunit	7 out of 54 genes, 13.0%	23 out of 2341 background genes, 1.0%	2.62e-05	0	C1_06070W_A:C2_02270C_A:C4_00660W_A:MRP17:C5_04530W_A:C6_01980C_A:C6_03730C_A	5763
31974	membrane-enclosed lumen	26 out of 54 genes, 48.1%	431 out of 2341 background genes, 18.4%	2.69e-05	0	C1_01160C_A:C1_01580W_A:MRPL27:C1_06070W_A:MRPL3:IDH1:CSI2:C1_12680W_A:C2_01030W_A:C2_02270C_A:SUV3:C2_07190C_A:C2_07680W_A:C4_00660W_A:ZUO1:NAN1:C4_03410W_A:C4_03730C_A:MRP17:C5_00820W_A:C5_04530W_A:C6_01980C_A:C6_03730C_A:YML6:MRPL6:ACO1	5763:33553:32040:42645:324:5762:30687:5759:5844:5962:34455:178:177:62040:5622:5737:5829:5840:5739:262:5730:176:45025
43233	organelle lumen	26 out of 54 genes, 48.1%	431 out of 2341 background genes, 18.4%	2.69e-05	0	C1_01160C_A:C1_01580W_A:MRPL27:C1_06070W_A:MRPL3:IDH1:CSI2:C1_12680W_A:C2_01030W_A:C2_02270C_A:SUV3:C2_07190C_A:C2_07680W_A:C4_00660W_A:ZUO1:NAN1:C4_03410W_A:C4_03730C_A:MRP17:C5_00820W_A:C5_04530W_A:C6_01980C_A:C6_03730C_A:YML6:MRPL6:ACO1	5763:33553:32040:42645:324:5762:30687:5759:5844:5962:34455:178:177:62040:5622:5737:5829:5840:5739:262:5730:176:45025
70013	intracellular organelle lumen	26 out of 54 genes, 48.1%	431 out of 2341 background genes, 18.4%	2.69e-05	0	C1_01160C_A:C1_01580W_A:MRPL27:C1_06070W_A:MRPL3:IDH1:CSI2:C1_12680W_A:C2_01030W_A:C2_02270C_A:SUV3:C2_07190C_A:C2_07680W_A:C4_00660W_A:ZUO1:NAN1:C4_03410W_A:C4_03730C_A:MRP17:C5_00820W_A:C5_04530W_A:C6_01980C_A:C6_03730C_A:YML6:MRPL6:ACO1	5763:33553:32040:42645:324:5762:30687:5759:5844:5962:34455:178:177:62040:5622:5737:5829:5840:5739:262:5730:176:45025
43228	non-membrane-bounded organelle	28 out of 54 genes, 51.9%	522 out of 2341 background genes, 22.3%	8.93e-05	0	TIF:C1_01580W_A:MRPL27:C1_06070W_A:MRPL3:IDH1:CSI2:C1_12680W_A:C2_01030W_A:C2_02270C_A:SUV3:C2_07190C_A:C2_07680W_A:ARP9:SES1:C3_06700C_A:C4_00660W_A:ZUO1:NAN1:C4_03410W_A:MRP17:C5_00820W_A:C5_04530W_A:C6_01980C_A:C6_03730C_A:YML6:MRPL6:ACO1	5763:33553:32040:42645:324:5762:30687:5759:5844:16514:5962:34455:62040:5622:5737:5829:5840:5739:262:16586:932:5730:5634:45025:10494:32592:16281
43232	intracellular non-membrane-bounded organelle	28 out of 54 genes, 51.9%	522 out of 2341 background genes, 22.3%	8.93e-05	0	TIF:C1_01580W_A:MRPL27:C1_06070W_A:MRPL3:IDH1:CSI2:C1_12680W_A:C2_01030W_A:C2_02270C_A:SUV3:C2_07190C_A:C2_07680W_A:ARP9:SES1:C3_06700C_A:C4_00660W_A:ZUO1:NAN1:C4_03410W_A:MRP17:C5_00820W_A:C5_04530W_A:C6_01980C_A:C6_03730C_A:YML6:MRPL6:ACO1	5763:33553:32040:42645:324:5762:30687:5759:5844:16514:5962:34455:62040:5622:5737:5829:5840:5739:262:16586:932:5730:5634:45025:10494:32592:16281
5622	intracellular anatomical structure	50 out of 54 genes, 92.6%	1513 out of 2341 background genes, 64.6%	9.39e-05	0	C1_01160C_A:TIF:C1_01530C_A:C1_01580W_A:C1_02450C_A:MRPL27:CHS7:C1_06070W_A:MRPL3:IDH1:SHY1:C1_11890W_A:CSI2:WRS1:C1_12680W_A:C1_13010W_A:C1_13030C_A:C1_13060C_A:C2_01030W_A:C2_02270C_A:SUV3:RIM2:C2_07190C_A:C2_07680W_A:MSU1:C3_00420W_A:ARP9:SES1:C3_06700C_A:KRS1:C4_00660W_A:RPC53:ZUO1:NAN1:C4_03410W_A:C4_03730C_A:MRP17:PET9:C5_00820W_A:QCR2:C5_04530W_A:C6_01980C_A:C6_03730C_A:C7_00330C_A:YML6:MS…	5666:5763:33553:32040:5789:42645:324:5762:16021:5750:5886:5759:30687:5844:16514:5962:5935:34455:178:177:62040:5622:5737:30061:5829:5840:5739:5777:262:16586:932:106143:5743:16020:5730:5634:176:45025:31314:10494:5576:32592:31224:16281
43231	intracellular membrane-bounded organelle	44 out of 54 genes, 81.5%	1185 out of 2341 background genes, 50.6%	0.00012	0	C1_01160C_A:C1_01580W_A:C1_02450C_A:MRPL27:CHS7:C1_06070W_A:MRPL3:IDH1:SHY1:C1_11890W_A:CSI2:C1_12680W_A:C1_13010W_A:C1_13030C_A:C1_13060C_A:C2_01030W_A:C2_02270C_A:SUV3:RIM2:C2_07190C_A:C2_07680W_A:MSU1:C3_00420W_A:ARP9:C3_06700C_A:C4_00660W_A:RPC53:ZUO1:NAN1:C4_03410W_A:C4_03730C_A:MRP17:PET9:C5_00820W_A:QCR2:C5_04530W_A:C6_01980C_A:C6_03730C_A:C7_00330C_A:YML6:MSK1:C7_02340C_A:MRPL6:ACO1	5666:5763:33553:32040:5789:42645:324:5762:16021:5750:5886:5759:30687:5844:16514:5962:5935:34455:178:177:62040:5622:5737:30061:5829:5840:5739:5777:262:16586:932:106143:5743:16020:5730:5634:176:45025:31314:5576:32592:31224
43229	intracellular organelle	46 out of 54 genes, 85.2%	1300 out of 2341 background genes, 55.5%	0.00017	0	C1_01160C_A:TIF:C1_01580W_A:C1_02450C_A:MRPL27:CHS7:C1_06070W_A:MRPL3:IDH1:SHY1:C1_11890W_A:CSI2:C1_12680W_A:C1_13010W_A:C1_13030C_A:C1_13060C_A:C2_01030W_A:C2_02270C_A:SUV3:RIM2:C2_07190C_A:C2_07680W_A:MSU1:C3_00420W_A:ARP9:SES1:C3_06700C_A:C4_00660W_A:RPC53:ZUO1:NAN1:C4_03410W_A:C4_03730C_A:MRP17:PET9:C5_00820W_A:QCR2:C5_04530W_A:C6_01980C_A:C6_03730C_A:C7_00330C_A:YML6:MSK1:C7_02340C_A:MRPL6:A…	5666:5763:33553:32040:5789:42645:324:5762:16021:5750:5886:5759:30687:5844:16514:5962:5935:34455:178:177:62040:5622:5737:30061:5829:5840:5739:5777:262:16586:932:106143:5743:16020:5730:5634:176:45025:31314:10494:5576:32592:31224:16281
43227	membrane-bounded organelle	44 out of 54 genes, 81.5%	1235 out of 2341 background genes, 52.8%	0.00051	0	C1_01160C_A:C1_01580W_A:C1_02450C_A:MRPL27:CHS7:C1_06070W_A:MRPL3:IDH1:SHY1:C1_11890W_A:CSI2:C1_12680W_A:C1_13010W_A:C1_13030C_A:C1_13060C_A:C2_01030W_A:C2_02270C_A:SUV3:RIM2:C2_07190C_A:C2_07680W_A:MSU1:C3_00420W_A:ARP9:C3_06700C_A:C4_00660W_A:RPC53:ZUO1:NAN1:C4_03410W_A:C4_03730C_A:MRP17:PET9:C5_00820W_A:QCR2:C5_04530W_A:C6_01980C_A:C6_03730C_A:C7_00330C_A:YML6:MSK1:C7_02340C_A:MRPL6:ACO1	5666:5763:33553:32040:5789:42645:324:5762:16021:5750:5886:5759:30687:5844:16514:5962:5935:34455:178:177:62040:5622:5737:30061:5829:5840:5739:5777:262:16586:932:106143:5743:16020:5730:5634:176:45025:31314:5576:32592:31224
43226	organelle	46 out of 54 genes, 85.2%	1348 out of 2341 background genes, 57.6%	0.00066	0	C1_01160C_A:TIF:C1_01580W_A:C1_02450C_A:MRPL27:CHS7:C1_06070W_A:MRPL3:IDH1:SHY1:C1_11890W_A:CSI2:C1_12680W_A:C1_13010W_A:C1_13030C_A:C1_13060C_A:C2_01030W_A:C2_02270C_A:SUV3:RIM2:C2_07190C_A:C2_07680W_A:MSU1:C3_00420W_A:ARP9:SES1:C3_06700C_A:C4_00660W_A:RPC53:ZUO1:NAN1:C4_03410W_A:C4_03730C_A:MRP17:PET9:C5_00820W_A:QCR2:C5_04530W_A:C6_01980C_A:C6_03730C_A:C7_00330C_A:YML6:MSK1:C7_02340C_A:MRPL6:A…	5666:5763:33553:32040:5789:42645:324:5762:16021:5750:5886:5759:30687:5844:16514:5962:5935:34455:178:177:62040:5622:5737:30061:5829:5840:5739:5777:262:16586:932:106143:5743:16020:5730:5634:176:45025:31314:10494:5576:32592:31224:16281
42645	mitochondrial nucleoid	4 out of 54 genes, 7.4%	15 out of 2341 background genes, 0.6%	0.01745	0.0008	IDH1:SUV3:C2_07190C_A:ACO1	42645:5762:5759:5962:62040:5622:5829:5739:262:45025
9295	nucleoid	4 out of 54 genes, 7.4%	15 out of 2341 background genes, 0.6%	0.01745	0.0007	IDH1:SUV3:C2_07190C_A:ACO1	42645:5762:5759:5962:62040:5622:5829:5739:262:45025
45025	mitochondrial degradosome	2 out of 54 genes, 3.7%	2 out of 2341 background genes, 0.1%	0.03187	0.0043	SUV3:MSU1	5739:262:45025
177	cytoplasmic exosome (RNase complex)	3 out of 54 genes, 5.6%	10 out of 2341 background genes, 0.4%	0.07577	0.0055	C1_01160C_A:SUV3:MSU1	178:177:5739:262:176:45025
